# Supplementary material for: Reductive desulfurization of aromatic sulfides with nickel boride in deep eutectic solvents
Source: Royal Society of Chemistry journal article supplement (doi:10.1039/d0nj05951j), 2021-01-01
Supplement: d0nj05951j1.pdf [file d0nj05951j1.pdf]

# Reductive desulfurization of aromatic sulfides with nickel boride in deep eutectic solvent

Chenhua Shu,\* Xunzheng Liu, Wenjing Xie, Shuiping Cai, Wenting Li, Mengjiao  
wang

School of Chemistry and Environmental Science, Shangrao Normal University,

Shangrao 334001, P. R. China

Corresponding Author. \*E-mail: [chenhuashu@hotmail.com](mailto:chenhuashu@hotmail.com)

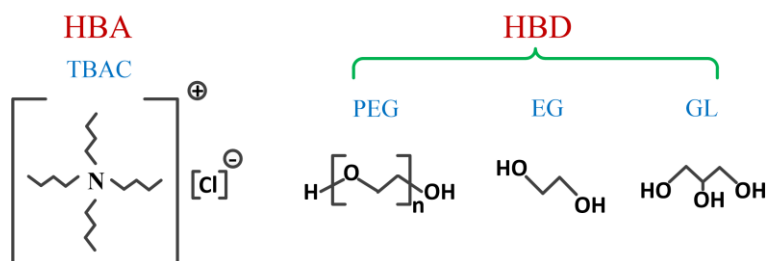

**Scheme S1** Molecular structure of HBA (TBAC) and HBD (PEG, EG and GL).

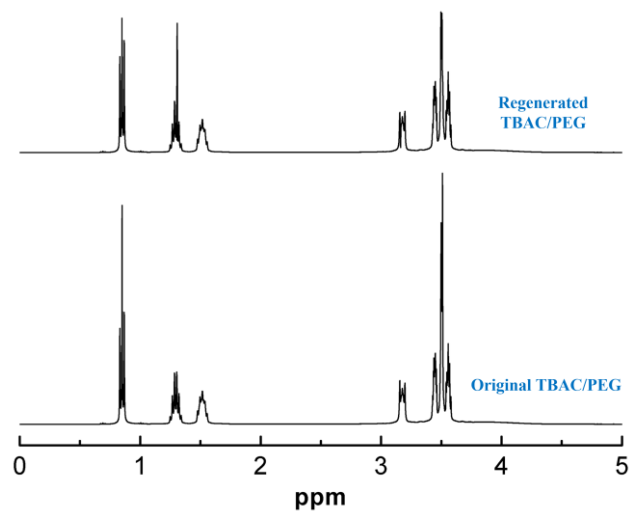

**Fig. S1** <sup>1</sup>H NMR spectra of original and regenerated TBAC/PEG.

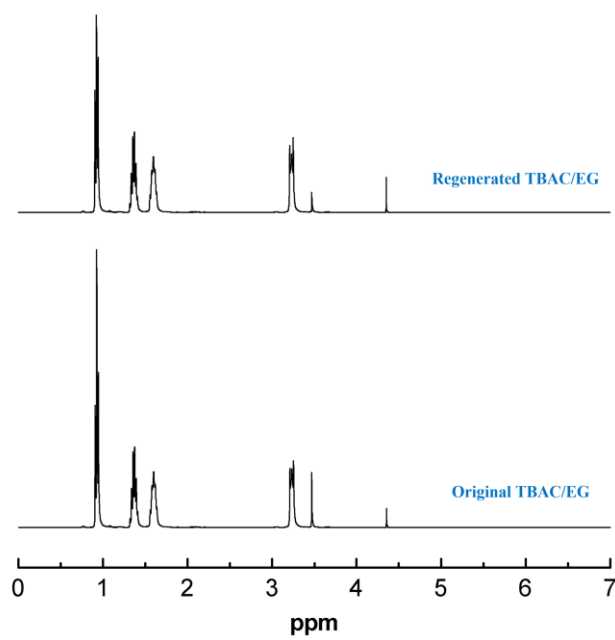

**Fig. S2** <sup>1</sup>H NMR spectra of original and regenerated TBAC/EG.

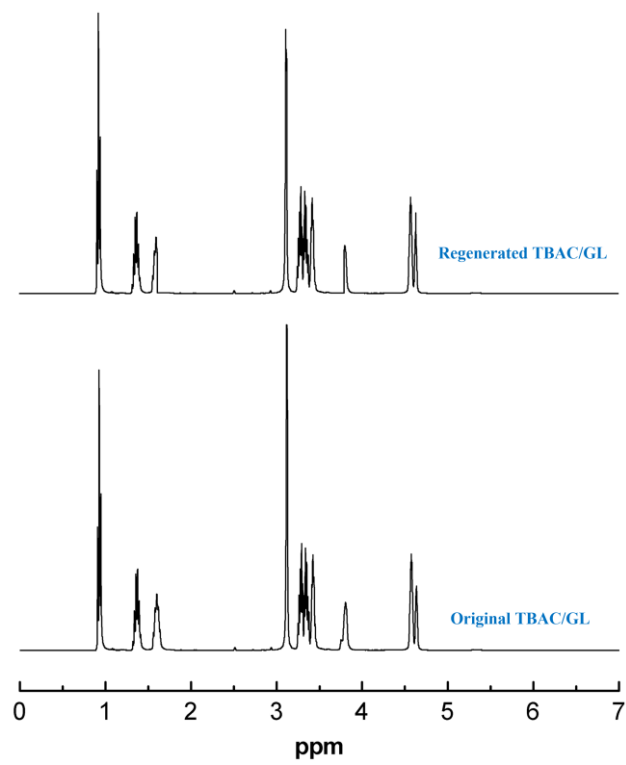

**Fig. S3**  $^1\text{H}$  NMR spectra of original and regenerated TBAC/GL.
